# Supplementary material for: Effects of Lactiplantibacillus plantarum LPJZ-658 Supplementation on the Production, Meat Quality, Intestinal Morphology, and Cecal Microbiota of Broilers Chickens
Source: MDPI journal article supplement (doi:10.3390/microorganisms11061549), 2023-06-10
Supplement: s1 [file s1]

**Table S1.** Muscular antioxidant status in broilers at 42 days of age

| Items                             | CON          | LPJZ-658     | <i>p</i> -Value |
|-----------------------------------|--------------|--------------|-----------------|
| Breast                            |              |              |                 |
| MDA (nmol mg prot <sup>-1</sup> ) | 1.34 ± 0.02  | 0.21 ± 0.04  | 0.072           |
| SOD (U mg prot <sup>-1</sup> )    | 24.19 ± 2.71 | 22.62 ± 4.25 | 0.760           |
| Thigh                             |              |              |                 |
| MDA (nmol mg prot <sup>-1</sup> ) | 1.73 ± 0.25  | 1.49 ± 0.25  | 0.452           |
| SOD (U mg prot <sup>-1</sup> )    | 50.01 ± 4.91 | 56.75 ± 8.23 | 0.493           |

MDA, malonaldehyde; SOD, superoxide dismutase. SEM: standard error of mean. Data are expressed as the means ± SEM.  $p < 0.05$  were taken to indicate statistical significance.

**Table S2.** The levels of immunoglobulins in the plasma of broilers at 42 days of age

| Items       | CON          | LPJZ-658     | <i>p</i> -Value |
|-------------|--------------|--------------|-----------------|
| IgM (mg/ml) | 31.02 ± 2.79 | 32.54 ± 2.48 | 0.689           |
| IgG (mg/ml) | 18.63 ± 0.93 | 27.21 ± 2.80 | 0.015           |
| IgA (mg/ml) | 1.28 ± 0.11  | 1.3 ± 0.06   | 0.856           |

SEM: standard error of mean. Data are expressed as the means ± SEM.  $p < 0.05$  were taken to indicate statistical significance.
